# Supplementary material for: Facile one-pot synthesis of uniform TiO2–Ag hybrid hollow spheres with enhanced photocatalytic activity
Source: Royal Society of Chemistry journal article supplement (doi:10.1039/c2dt32040a), 2012-10-10
Supplement: c2dt32040a.pdf [file c2dt32040a.pdf]

## ESI:

### **Facile one-pot synthesis of uniform TiO<sub>2</sub>-Ag hybrid hollow spheres with enhanced photocatalytic activity**

Sunli Wang,<sup>a†</sup> Huanhuan Qian,<sup>a†</sup> Yong Hu,<sup>\*a</sup> Wei Dai,<sup>a</sup> Yijun Zhong,<sup>a</sup> Jiafu Chen,<sup>b</sup> and Xiao Hu<sup>c</sup>

#### **Experimental Section:**

Synthesis of P25-Ag hybrids: In a typical experiment, 0.02g P25 and 0.005g AgNO<sub>3</sub> were dissolved in 40 mL of distilled water with the assistance of ultrasonication for 10 min. Successively, the mixture was transferred into a 50 mL Teflon-lined autoclave, and maintained at 150 °C for 10 h. After collected by centrifugation, the products were washed with ethanol and distilled water three times, before dried at 80°C for more than 6 h.

Synthesis of TiO<sub>2</sub>-Ag hybrids: In a typical procedure, 0.096 g of Ti(SO<sub>4</sub>)<sub>2</sub>, 0.288g of urea and 0.005g AgNO<sub>3</sub> were dissolved in 40 mL of distilled water with the assistance of ultrasonication for 10 min. Successively, the mixture was transferred into a 50 mL Teflon-lined autoclave, and maintained at 150 °C for 10 h. After collected by centrifugation, the products were washed with ethanol and distilled water three times, before dried at 80°C for more than 6 h. The final hybrid hollow spheres were obtained after calcination the above samples at 400 °C in static air for 2 h.

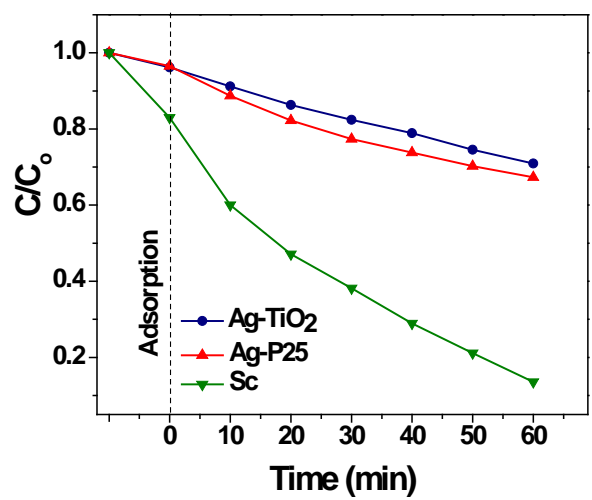

**Fig. S1.** The photocatalytic degradation of RhB using different photocatalysts.
